# Supplementary material for: Impact of smoke-free legislation on perinatal and infant mortality: a national quasi-experimental study
Source: PubMed Central journal article supplement (PMC4534797; doi:10.1038/srep13020), 2015-08-13
Supplement: srep13020-s1.pdf [file srep13020-s1.pdf]

*Supplementary Information*

Impact of smoke-free legislation on perinatal and infant mortality: a national quasi-experimental study

Jasper V Been, Daniel F Mackay, Christopher Millett, Jill P Pell, Onno CP van Schayck, Aziz Sheikh

Supplementary Table S1. Full multivariate logistic regression models for primary outcomes

|                                        | Low birth weight |             | Stillbirth |             | Neonatal mortality |             | SIDS  |             |
|----------------------------------------|------------------|-------------|------------|-------------|--------------------|-------------|-------|-------------|
|                                        | OR               | 95%CI       | OR         | 95%CI       | OR                 | 95%CI       | OR    | 95%CI       |
| Smoke-free legislation                 | 0.961            | 0.949-0.974 | 0.922      | 0.881-0.965 | 0.923              | 0.883-0.966 | 1.018 | 0.916-1.132 |
| Month (ref = January)                  |                  |             |            |             |                    |             |       |             |
| February                               | 0.982            | 0.970-0.995 | 0.949      | 0.907-0.993 | 0.945              | 0.888-1.006 | 0.882 | 0.763-1.019 |
| March                                  | 0.971            | 0.960-0.984 | 0.967      | 0.925-1.010 | 0.934              | 0.879-0.993 | 0.973 | 0.847-1.117 |
| April                                  | 0.978            | 0.966-0.991 | 0.948      | 0.907-0.991 | 0.929              | 0.874-0.988 | 0.884 | 0.766-1.020 |
| May                                    | 0.976            | 0.963-0.988 | 0.946      | 0.906-0.989 | 0.934              | 0.879-0.992 | 0.886 | 0.769-1.020 |
| June                                   | 0.962            | 0.950-0.975 | 0.984      | 0.941-1.028 | 0.939              | 0.883-0.998 | 0.840 | 0.727-0.971 |
| July                                   | 0.959            | 0.947-0.971 | 0.941      | 0.901-0.984 | 0.959              | 0.903-1.019 | 0.823 | 0.712-0.948 |
| August                                 | 0.952            | 0.940-0.964 | 0.946      | 0.905-0.989 | 0.920              | 0.865-0.978 | 1.024 | 0.894-1.173 |
| September                              | 0.910            | 0.898-0.922 | 0.963      | 0.921-1.006 | 0.980              | 0.923-1.042 | 0.952 | 0.829-1.094 |
| October                                | 0.958            | 0.946-0.970 | 0.964      | 0.923-1.008 | 0.960              | 0.904-1.020 | 1.059 | 0.925-1.212 |
| November                               | 0.980            | 0.968-0.993 | 0.937      | 0.896-0.980 | 0.942              | 0.885-1.001 | 1.065 | 0.929-1.220 |
| December                               | 1.020            | 1.007-1.033 | 0.938      | 0.897-0.981 | 0.957              | 0.901-1.018 | 1.062 | 0.927-1.216 |
| Maternal age (years; ref = 25-29)      |                  |             |            |             |                    |             |       |             |
| <20                                    | 1.261            | 1.248-1.275 | 1.010      | 0.972-1.049 | 1.136              | 1.080-1.195 | 2.216 | 2.020-2.430 |
| 20-24                                  | 1.132            | 1.123-1.140 | 0.994      | 0.967-1.022 | 1.075              | 1.035-1.116 | 1.551 | 1.429-1.683 |
| 30-34                                  | 0.928            | 0.921-0.935 | 1.028      | 1.002-1.054 | 0.971              | 0.938-1.005 | 0.844 | 0.768-0.927 |
| 35-39                                  | 1.023            | 1.014-1.032 | 1.110      | 1.078-1.143 | 1.014              | 0.973-1.057 | 0.846 | 0.752-0.951 |
| ≥40                                    | 1.246            | 1.227-1.265 | 1.421      | 1.356-1.489 | 1.130              | 1.054-1.122 | 0.839 | 0.672-1.049 |
| Marital status (ref = not married)     |                  |             |            |             |                    |             |       |             |
| Married                                | 0.794            | 0.790-0.799 | 1.036      | 1.015-1.057 | 1.072              | 1.043-1.102 | 0.403 | 0.376-0.431 |
| Sex (ref = female)                     |                  |             |            |             |                    |             |       |             |
| Male                                   | 0.853            | 0.848-0.857 | 1.123      | 1.103-1.144 | 1.331              | 1.298-1.365 | 1.430 | 1.348-1.517 |
| Birth weight (grams; ref = 2500-3999)  |                  |             |            |             |                    |             |       |             |
| <1000                                  | -                | -           | 198.1      | 193.3-203.0 | 512.6              | 497.2-528.5 | 3.635 | 2.847-4.639 |
| 1000-1499                              | -                | -           | 60.90      | 59.07-62.78 | 51.26              | 49.01-53.61 | 5.874 | 4.980-6.929 |
| 1500-2499                              | -                | -           | 12.17      | 11.88-12.47 | 8.396              | 8.084-8.720 | 3.759 | 3.485-4.055 |
| ≥4000                                  | -                | -           | 0.916      | 0.874-0.960 | 0.778              | 0.725-0.834 | 0.502 | 0.437-0.573 |
| IMD quintile (ref = 1 (most deprived)) |                  |             |            |             |                    |             |       |             |
| 2                                      | 0.924            | 0.917-0.931 | 0.972      | 0.946-0.998 | 1.043              | 1.006-1.081 | 0.957 | 0.879-1.041 |
| 3                                      | 0.871            | 0.864-0.878 | 0.952      | 0.924-0.981 | 0.961              | 0.923-1.000 | 0.919 | 0.839-1.007 |
| 4                                      | 0.764            | 0.757-0.771 | 0.957      | 0.927-0.987 | 0.915              | 0.876-0.955 | 0.910 | 0.825-1.004 |
| 5 (least deprived)                     | 0.762            | 0.754-0.770 | 0.932      | 0.898-0.967 | 0.884              | 0.840-0.931 | 0.841 | 0.749-0.943 |
| Region (ref = Greater London)          |                  |             |            |             |                    |             |       |             |
| North East                             | 0.901            | 0.889-0.913 | 0.992      | 0.946-1.039 | 1.093              | 1.023-1.168 | 1.156 | 1.004-1.331 |
| North West                             | 0.961            | 0.952-0.970 | 0.975      | 0.944-1.008 | 1.207              | 1.154-1.263 | 1.392 | 1.257-1.543 |
| Yorkshire and the Humber               | 1.013            | 1.003-1.024 | 1.024      | 0.988-1.060 | 1.332              | 1.270-1.397 | 1.062 | 0.945-1.194 |
| East Midlands                          | 0.967            | 0.956-0.978 | 0.942      | 0.905-0.981 | 1.269              | 1.202-1.340 | 1.090 | 0.957-1.242 |
| West Midlands                          | 1.058            | 1.048-1.068 | 0.924      | 0.893-0.955 | 1.406              | 1.345-1.470 | 1.090 | 0.973-1.220 |
| East of England                        | 0.883            | 0.874-0.893 | 0.948      | 0.913-0.985 | 1.053              | 0.999-1.111 | 0.947 | 0.831-1.079 |
| South East                             | 0.841            | 0.830-0.851 | 0.941      | 0.902-0.981 | 0.948              | 0.892-1.009 | 1.099 | 0.959-1.260 |
| South Central                          | 0.873            | 0.862-0.883 | 0.949      | 0.910-0.990 | 1.054              | 0.993-1.118 | 1.058 | 0.919-1.220 |
| South West                             | 0.876            | 0.866-0.886 | 0.927      | 0.890-0.965 | 1.160              | 1.097-1.227 | 1.256 | 1.107-1.425 |
| Urbanisation level (ref = rural)       |                  |             |            |             |                    |             |       |             |
| Urban                                  | 1.167            | 1.143-1.192 | 0.920      | 0.858-0.985 | 0.963              | 0.873-1.062 | 1.323 | 1.045-1.675 |

Odds ratios indicate odds of developing outcome in period after versus period before July 2007, when smoke-free legislation was introduced. Models are adjusted for non-linear underlying time trends (via B-splines), month, maternal age, maternal marital status, sex, socioeconomic status, region, and urbanisation level and based on

individual-level analysis of complete cases. Mortality models are furthermore adjusted for birth weight. Odds ratios are shown for smoke-free legislation and all covariates in the model (except the B-spline terms). Odds ratios for developing a distinct outcome are expressed relative to the reference group for each variable. SIDS = sudden infant death syndrome; OR = odds ratio; CI = confidence interval; IMD = Index of Multiple Deprivation.



|                                  |       |             |       |             |       |             |       |             |       |             |
|----------------------------------|-------|-------------|-------|-------------|-------|-------------|-------|-------------|-------|-------------|
| 2                                | 0.905 | 0.889-0.922 | 1.054 | 1.012-1.097 | 1.010 | 0.944-1.080 | 1.016 | 0.971-1.063 | 1.032 | 1.003-1.063 |
| 3                                | 0.849 | 0.832-0.866 | 0.959 | 0.916-1.003 | 0.983 | 0.911-1.060 | 0.914 | 0.868-0.962 | 0.938 | 0.908-0.969 |
| 4                                | 0.700 | 0.685-0.715 | 0.932 | 0.887-0.979 | 0.894 | 0.824-0.971 | 0.887 | 0.841-0.937 | 0.898 | 0.868-0.930 |
| 5 (least deprived)               | 0.677 | 0.660-0.695 | 0.894 | 0.843-0.948 | 0.878 | 0.796-0.969 | 0.805 | 0.754-0.860 | 0.847 | 0.813-0.882 |
| Region (ref = Greater London)    |       |             |       |             |       |             |       |             |       |             |
| North East                       | 0.806 | 0.780-0.833 | 1.105 | 1.025-1.192 | 1.055 | 0.935-1.190 | 0.940 | 0.867-1.020 | 1.030 | 0.977-1.085 |
| North West                       | 0.840 | 0.821-0.859 | 1.237 | 1.175-1.303 | 1.133 | 1.042-1.232 | 1.124 | 1.063-1.188 | 1.176 | 1.134-1.219 |
| Yorkshire and the Humber         | 0.890 | 0.867-0.912 | 1.356 | 1.283-1.432 | 1.254 | 1.149-1.370 | 1.153 | 1.087-1.223 | 1.260 | 1.214-1.310 |
| East Midlands                    | 0.855 | 0.832-0.879 | 1.334 | 1.254-1.419 | 1.107 | 0.999-1.227 | 0.953 | 0.887-1.023 | 1.135 | 1.086-1.186 |
| West Midlands                    | 0.972 | 0.951-0.995 | 1.543 | 1.468-1.622 | 1.072 | 0.982-1.170 | 1.027 | 0.969-1.089 | 1.248 | 1.204-1.294 |
| East of England                  | 0.816 | 0.795-0.838 | 1.115 | 1.049-1.185 | 0.915 | 0.826-1.014 | 0.933 | 0.872-0.998 | 1.001 | 0.959-1.045 |
| South East                       | 0.740 | 0.718-0.762 | 0.997 | 0.929-1.069 | 0.844 | 0.750-0.949 | 0.850 | 0.787-0.919 | 0.905 | 0.862-0.951 |
| South Central                    | 0.826 | 0.802-0.850 | 1.070 | 1.000-1.145 | 1.019 | 0.913-1.137 | 0.940 | 0.872-1.013 | 1.007 | 0.960-1.056 |
| South West                       | 0.813 | 0.791-0.836 | 1.217 | 1.141-1.297 | 1.022 | 0.919-1.138 | 0.954 | 0.888-1.025 | 1.073 | 1.026-1.123 |
| Urbanisation level (ref = rural) |       |             |       |             |       |             |       |             |       |             |
| Urban                            | 1.180 | 1.120-1.244 | 0.901 | 0.807-1.006 | 1.149 | 0.937-1.409 | 1.161 | 1.017-1.326 | 1.040 | 0.960-1.127 |

Odds ratios indicate odds of developing outcome in period after versus period before July 2007, when smoke-free legislation was introduced. Models are adjusted for non-linear underlying time trends (via B-splines), month, maternal age, maternal marital status, sex, socioeconomic status, region, and urbanisation level and based on individual-level analysis of complete cases. Mortality models are furthermore adjusted for birth weight. Odds ratios are shown for smoke-free legislation and all covariates in the model (except the B-spline terms). Odds ratios for developing a distinct outcome are expressed relative to the reference group for each variable. OR = odds ratio; CI = confidence interval; IMD = Index of Multiple Deprivation.

Supplementary Table S3. Impact of smoke-free legislation on mortality outcomes with and without adjustment for birth weight

| Primary outcomes         | Primary analysis (adjusted for birth weight) |       |             |         | Sensitivity analysis (not adjusted for birth weight) |       |             |         |
|--------------------------|----------------------------------------------|-------|-------------|---------|------------------------------------------------------|-------|-------------|---------|
|                          | N                                            | OR    | 95%CI       | P-value | N                                                    | OR    | 95%CI       | P-value |
| Stillbirth               | 9,984,278                                    | 0.922 | 0.881-0.965 | <0.001  | 10,026,641                                           | 0.934 | 0.895-0.975 | 0.002   |
| Neonatal mortality       | 9,933,349                                    | 0.924 | 0.883-0.966 | 0.001   | 9,975,300                                            | 0.956 | 0.919-0.995 | 0.028   |
| SIDS                     | 9,933,349                                    | 1.018 | 0.916-1.132 | 0.735   | 9,975,300                                            | 0.998 | 0.898-1.109 | 0.970   |
| Secondary outcomes       |                                              |       |             |         |                                                      |       |             |         |
| Early neonatal mortality | 9,933,349                                    | 0.958 | 0.890-1.032 | 0.258   | 9,975,300                                            | 0.999 | 0.936-1.068 | 0.988   |
| Late neonatal mortality  | 9,911,272                                    | 0.863 | 0.793-0.940 | 0.001   | 9,952,103                                            | 0.895 | 0.824-0.972 | 0.008   |
| Post-neonatal mortality  | 9,904,292                                    | 0.954 | 0.900-1.010 | 0.106   | 9,944,960                                            | 0.961 | 0.909-1.017 | 0.173   |
| Infant mortality         | 9,933,349                                    | 0.937 | 0.904-0.971 | <0.001  | 9,975,300                                            | 0.958 | 0.927-0.990 | 0.011   |

Odds ratios indicate odds of developing outcome in period after versus period before July 2007, when smoke-free legislation was introduced. Primary models are adjusted for non-linear underlying time trends (via B-splines), month, maternal age, maternal marital status, sex, birth weight, socioeconomic status, region, and urbanisation level and based on individual-level analysis of complete cases. Sensitivity analyses include all these variables except birth weight. OR = odds ratio; CI = confidence interval; SIDS = sudden infant death syndrome

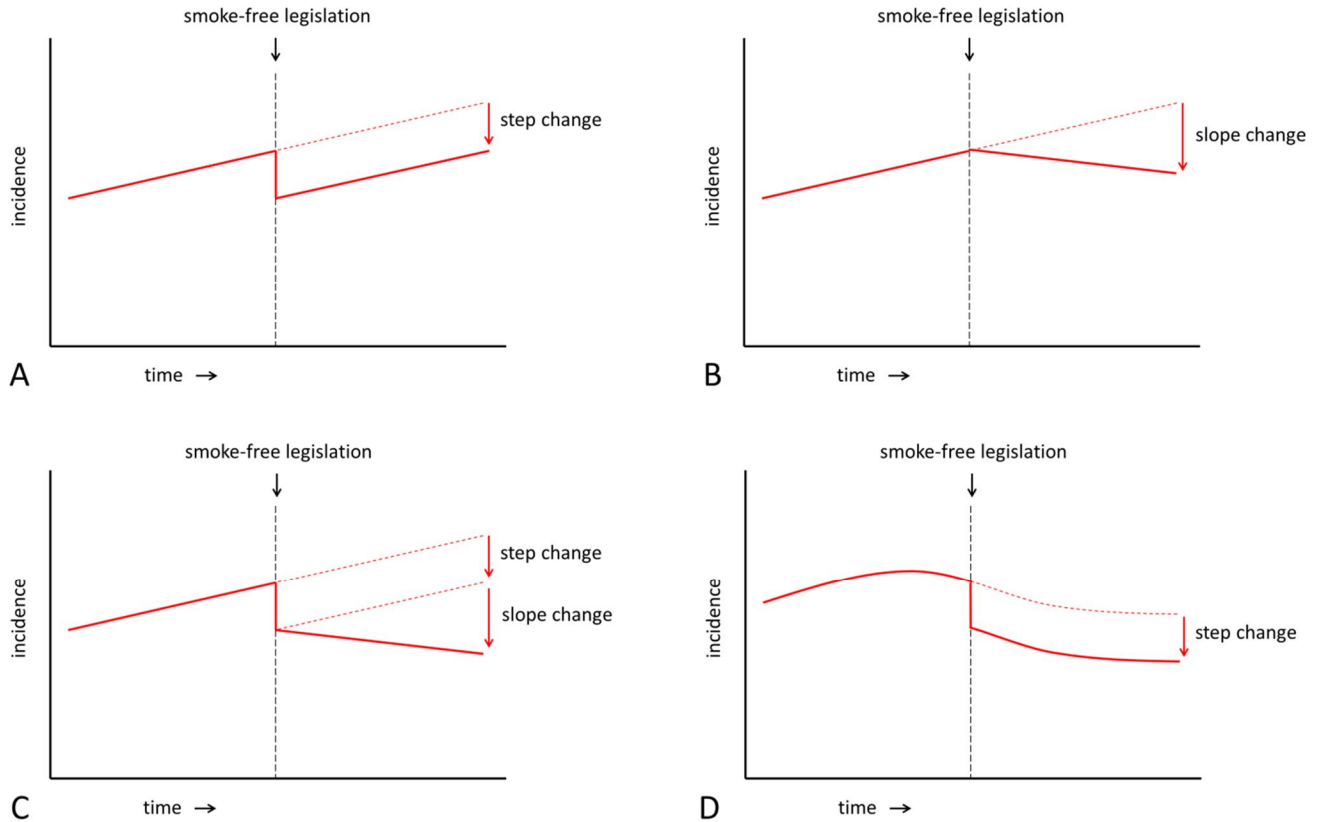

Supplementary Figure S1. Simplified graphical model representations. The different models considered for modelling the impact on smoke-free legislation on each outcome are displayed. Hypothetical temporal incidence trends and effect sizes are shown. A: linear time trend model with sudden ('step') change in incidence; B: linear time trend model with gradual ('slope') change in incidence; C: linear time trend model with step and slope change; D: non-linear time trend model with step change in incidence (three such models were evaluated with linear, quadratic, and cubic B-splines, respectively).

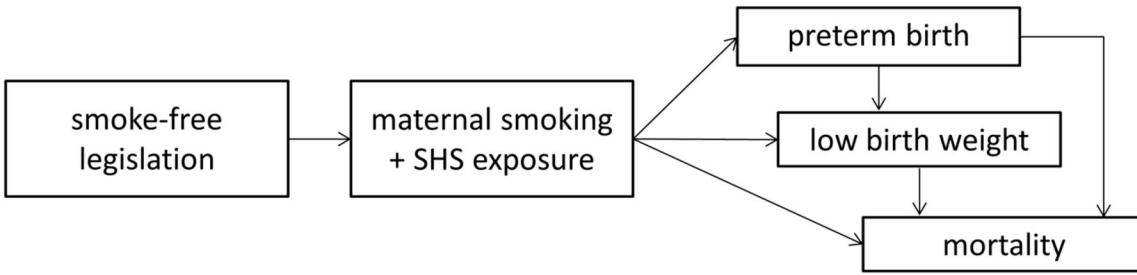

Supplementary Figure S2. Theoretical framework of causal pathways between smoke-free legislation and perinatal outcomes. Directed acyclic graph indicating likely causal pathways (all negative associations) based on previous studies. Note how preterm birth is an intermediate variable on the causal pathway from smoke-free legislation to reductions in low birth weight and perinatal mortality.



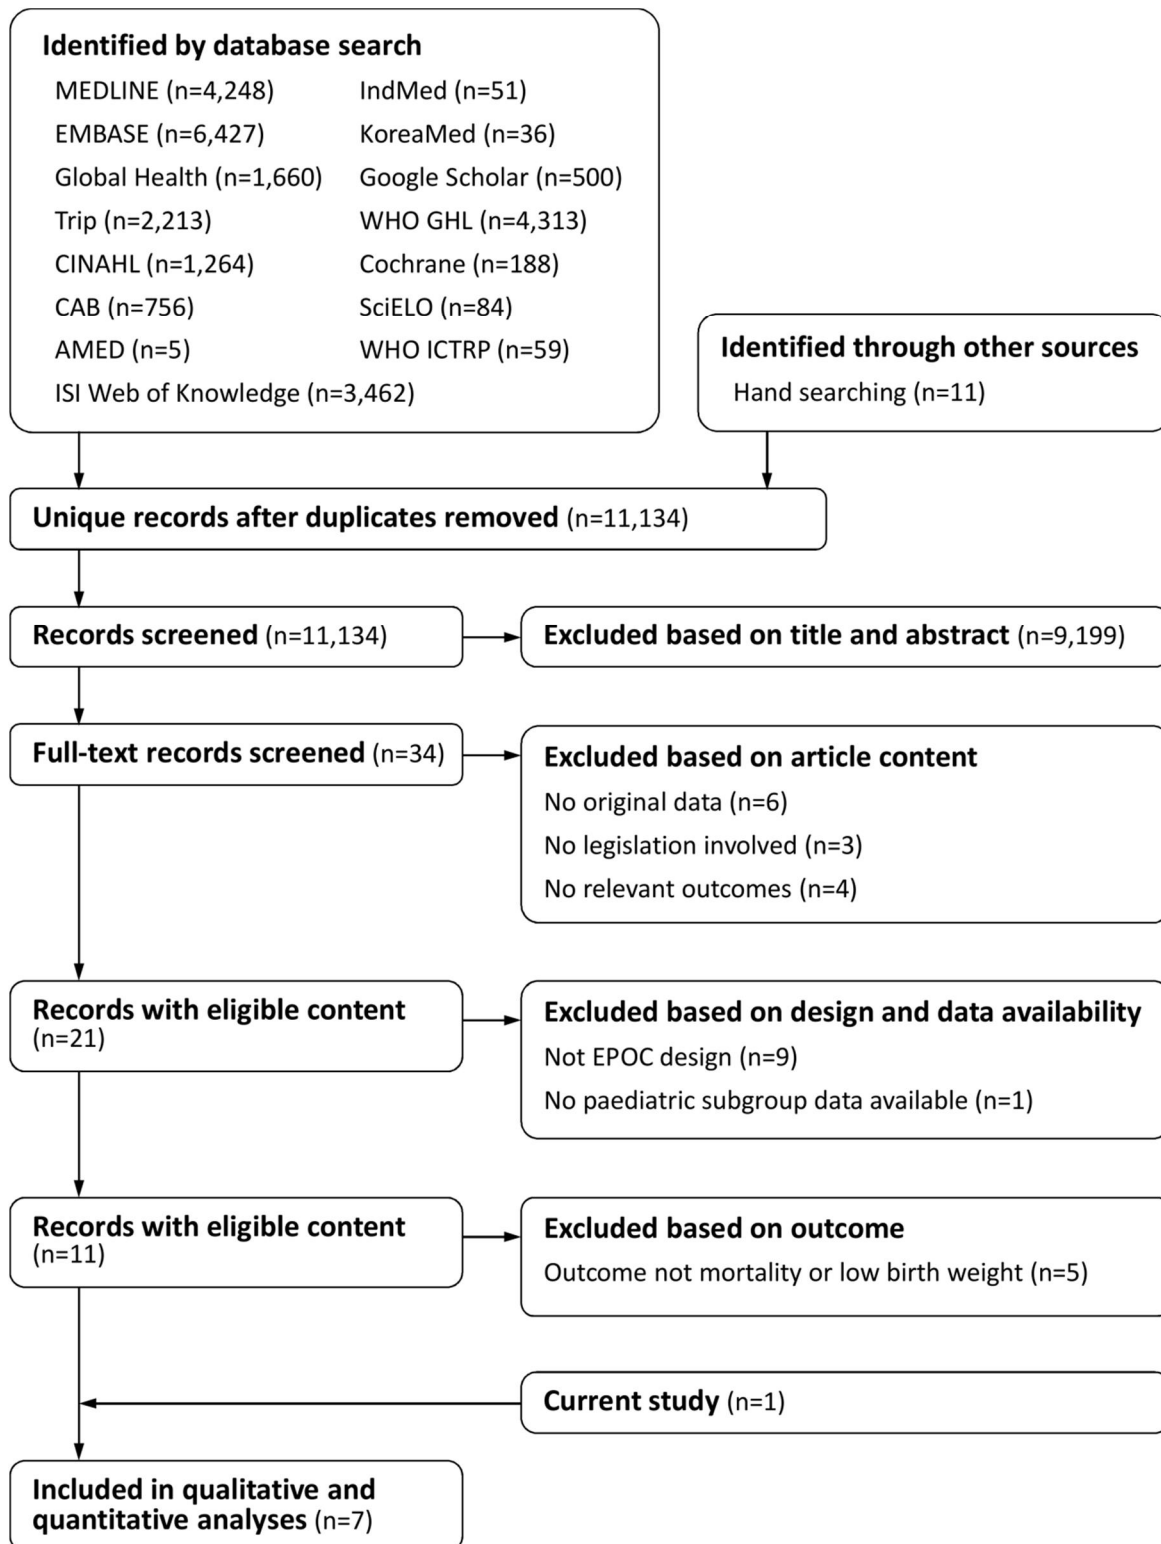

Supplementary Figure S3. Updated systematic review: study selection. Searches were performed in April 2014. Inclusion was restricted to studies of mortality and perinatal outcomes. EPOC=Cochrane Effective Practice and Organization of Care.
